# Supplementary material for: Selection of Orthologous Genes for Construction of a Highly Resolved Phylogenetic Tree and Clarification of the Phylogeny of Trichosporonales Species
Source: PLoS One. 2015 Aug 4;10(8):e0131217. doi: 10.1371/journal.pone.0131217 (PMC4524599; doi:10.1371/journal.pone.0131217)
Supplement: S3 Table — (XLSX) [file pone.0131217.s003.xlsx]

## Sheet: Sheet1
S3 Table. Phylogenetic trees based on amino acid and nucleotide sequences*1.
CDS product	Homolog to: (locus_tag of C. neoformans)	Based on amino acid sequences		Based on nucleic acid sequences
citrate synthase	CNA00510	(((((((T_asa:0.01504346,T_fae:0.00500043)1.0000:0.04006859,T_ink:0.01601853)1.0000:0.05920339,(T_cut:0.06605322,T_der:0.02837930)0.6700:0.02272746)0.6000:0.01710269,(C_cur:0.05031842,V_hum:0.07251359)0.2900:0.01762971)0.1700:0.00753360,((T_por:0.05422036,T_gam:0.06237819)0.3100:0.01811610,(T_sca:0.05370821,(T_bra:0.04553977,(T_gra:0.04109883,T_lai:0.04356181)0.1900:0.00702960)0.6100:0.02943665)0.…		((((((((((T_asa:0.01887069,T_fae:0.01152129)1.0000:0.03342795,T_ink:0.05563440)1.0000:0.04254414,T_cut:0.05153439)0.5800:0.01958484,T_der:0.04714585)0.4800:0.00985408,C_cur:0.06106942)0.5700:0.01282887,((T_por:0.04375361,T_gam:0.05537329)0.8900:0.01446518,(T_gra:0.04311618,(T_lai:0.04791498,(T_bra:0.04286339,T_sca:0.06359211)0.5200:0.01419306)0.2900:0.01103161)0.9300:0.02214724)0.9800:0.02238370)…
actin	CNA04650	(((((((((T_asa:0.00000000,T_fae:0.00266175)0.8200:0.00533740,T_ink:0.00000000)0.9300:0.01349056,V_hum:0.00533182)0.2800:0.00532198,T_por:0.00000000)0.0800:0.00266351,T_gam:0.01344728)0.0600:0.00263851,(B_kor:0.00000000,C_tep:0.00000000)0.9900:0.01069168)0.3500:0.00267478,(T_cut:0.00801923,T_der:0.00000000)0.8400:0.00531314)0.3100:0.00262958,(C_cur:0.01069482,(T_sca:0.00000000,(T_bra:0.00533225,(T…		(((((T_asa:0.00969950,T_fae:0.00974239)0.9800:0.01858914,T_ink:0.05273211)1.0000:0.02453277,(((T_cut:0.04256805,T_der:0.01855087)0.7300:0.01916431,((C_cur:0.02692629,T_gam:0.04845460)0.2900:0.01293586,T_por:0.02522611)0.1000:0.00476875)0.2000:0.00755586,(((T_bra:0.02688021,T_sca:0.02449388)0.7400:0.00548160,(T_gra:0.02519525,T_lai:0.02903685)0.6300:0.00986859)0.8500:0.01692870,V_hum:0.02189817)0.…
glycogen synthase kinase 3	CNB00720	((((((T_asa:0.00191595,T_fae:0.00313297)0.8800:0.00905123,T_ink:0.01756410)0.7600:0.01564879,(((T_cut:0.00754924,T_der:0.00505982)0.9500:0.01447235,((T_por:0.01021809,T_gam:0.02549337)0.5200:0.00245906,V_hum:0.03098886)0.2100:0.00324266)0.1900:0.00479960,(T_bra:0.00873935,(T_sca:0.00356580,(T_gra:0.01173988,T_lai:0.02113935)0.6200:0.00733093)0.4500:0.00564685)1.0000:0.02116201)0.4000:0.00618464)0…		((((((((T_asa:0.01856971,T_fae:0.01506194)1.0000:0.02345520,T_ink:0.04413354)1.0000:0.05406068,(T_cut:0.04023075,T_der:0.03771987)1.0000:0.03296135)0.5800:0.01781084,V_hum:0.08755024)0.2600:0.00887859,((T_por:0.03456275,T_gam:0.06539980)0.9900:0.02617801,(T_lai:0.04757753,(T_gra:0.04808714,(T_bra:0.05417080,T_sca:0.04040231)0.8700:0.01958868)0.5200:0.01667892)1.0000:0.03377762)0.7300:0.01566869)0…
alpha tubulin	CNB02810	(((((((((((T_asa:0.00000000,T_fae:0.00000000)1.0000:0.01141182,(T_cut:0.00468875,C_cur:0.02465906)0.5200:0.00347212)0.5500:0.00553065,T_der:0.00781352)0.6600:0.01057250,T_ink:0.02482974)0.4800:0.00850223,(T_bra:0.01313783,(T_por:0.01169011,T_gam:0.01479841)0.8300:0.00800893)0.3500:0.00271362)0.2800:0.00287596,T_sca:0.01555579)0.1100:0.00223107,T_lai:0.00432165)0.0300:0.00000000,T_gra:0.00674418)0…		((((((((((T_asa:0.00762766,T_fae:0.01204834)1.0000:0.02908311,T_ink:0.07040999)0.9700:0.02302510,(T_cut:0.03473958,T_der:0.03012833)0.9800:0.02171891)0.5600:0.00776959,C_cur:0.05504002)0.5400:0.01268656,T_lai:0.02824807)0.2900:0.01132117,(T_por:0.03280824,T_gam:0.03859402)0.8900:0.01923089)0.5100:0.00906687,(T_bra:0.05379132,(T_gra:0.02055058,T_sca:0.03802595)0.5700:0.00715170)0.7100:0.01098735)0…
ATP dependent DNA helicase	CNB05360	((((C_cur:0.09060149,(T_cut:0.05648824,T_der:0.07103098)1.0000:0.09488659)0.3600:0.02251916,(((T_ink:0.02276595,(T_asa:0.04888388,T_fae:0.01510379)1.0000:0.03187547)1.0000:0.05418056V_hum:0.07396806)0.5800:0.02384514,((T_por:0.03862024,T_gam:0.06271488)0.9900:0.03542983,(T_bra:0.06193398,(T_sca:0.02883482,(T_gra:0.03638982,T_lai:0.04090928)0.2900:0.00586237)0.6500:0.01297477)0.9500:0.01635935)0.5…		(((((((((T_asa:0.09474152,T_fae:0.06704767)1.0000:0.04652222,T_ink:0.07056458)1.0000:0.06993440,(T_cut:0.07769156,T_der:0.11810072)1.0000:0.07619834)0.4700:0.02739172,C_cur:0.16584797)0.2400:0.01836439,((T_por:0.07581485,T_gam:0.08956486)1.0000:0.04219670,((T_bra:0.10898758,T_sca:0.12543019)0.7200:0.03349359,(T_gra:0.06287115,T_lai:0.09616713)0.7900:0.01330965)0.8200:0.03483083)0.4500:0.01507871)…
beta 1-tubulin	CNC03260	((((((((T_asa:0.00223148,T_fae:0.00221679)0.9300:0.00835948,T_ink:0.00308702)1.0000:0.02240015,(T_cut:0.00224120,T_der:0.00446095)0.9800:0.01070256)0.1700:0.00344631,T_sca:0.01065715)0.0900:0.00222099,((T_gra:0.00000000,T_lai:0.00674755)0.9000:0.00227257,(C_cur:0.02833883V_hum:0.01875598)0.5400:0.00747037)0.3100:0.00500093)0.3400:0.00348106,(T_bra:0.00000000,(T_por:0.00000000,T_gam:0.01114757)0.6…		(((((((((T_asa:0.01148142,T_fae:0.00939599)1.0000:0.01973567,T_ink:0.03967216)1.0000:0.03041489,C_cur:0.06537566)0.1600:0.00818453,(((T_cut:0.02809071,T_der:0.02591816)1.0000:0.02468709V_hum:0.04223300)0.7200:0.01411618,(T_por:0.03217863,T_gam:0.03507405)0.9000:0.01254963)0.4700:0.01010192)0.7400:0.01321292,T_bra:0.02117341)0.2100:0.00350669,(T_lai:0.03122315,(T_gra:0.02112996,T_sca:0.04680225)0.…
argininosuccinate lyase	CNC04420	(((((((T_asa:0.00000000,T_fae:0.00628408)0.9100:0.00953772,T_ink:0.02666737)1.0000:0.03925358,((((T_por:0.02162039,T_gam:0.05384193)0.9600:0.03595325,(T_gra:0.03346697,T_lai:0.01524937)0.5800:0.01168968)0.2500:0.00407888,T_sca:0.02119209)0.1800:0.01126650,T_bra:0.02097932)0.5900:0.01485359)0.9700:0.03702026,V_hum:0.06173805)0.7700:0.02650356,(B_kor:0.03794480,C_tep:0.05617829)1.0000:0.05764647)0.…		((((((((T_asa:0.01451035,T_fae:0.03024595)1.0000:0.01906317,T_ink:0.05884230)1.0000:0.03892731,(((T_bra:0.04854834,T_sca:0.10917948)0.3100:0.01228073,(T_por:0.05248312,T_lai:0.04109027)0.7900:0.02136724)0.3800:0.01365875,(T_gra:0.05212957,T_gam:0.07180225)0.4900:0.01663877)0.7300:0.01617688)0.8700:0.03050790,V_hum:0.07072551)0.8600:0.02738252,(C_cur:0.09913937,(T_cut:0.05965375,T_der:0.05491079)0…
mitogen-activated protein kinase	CNC06590	((((((T_asa:0.00000000,T_fae:0.00000000)0.9700:0.00272388,T_ink:0.00546670)0.8100:0.00513877,(((T_por:0.00000000,T_gam:0.01378667)0.8900:0.01416904,(T_sca:0.00824481,((T_gra:0.00000000,T_lai:0.00000000)0.3000:0.00000000,T_bra:0.00000000)0.9400:0.00273660)0.6300:0.00274900)0.4200:0.00960049,V_hum:0.01555444)0.0900:0.00322375)0.2400:0.01141799,(C_cur:0.00356793,(T_cut:0.00000000,T_der:0.00320072)1.…		(((((((T_asa:0.02507974,T_fae:0.03794980)1.0000:0.04080205,T_ink:0.04879945)0.9900:0.04017050,(((T_por:0.05933683,T_gam:0.06550844)0.8100:0.02098686,((T_bra:0.06639798,T_sca:0.06686869)0.9900:0.03740497,(T_gra:0.07131643,T_lai:0.04942549)0.6200:0.01556482)0.8300:0.02783063)0.4300:0.01520854,V_hum:0.08841026)0.4100:0.01365028)0.1600:0.01596808,(T_cut:0.06130987,T_der:0.05698610)0.9700:0.03220546)0…
adenosylhomocysteinase	CND00240	((((((T_gra:0.02707351,T_lai:0.03267021)0.7100:0.01554033,(T_por:0.03069528,T_gam:0.05625642)0.7200:0.02395557)0.2200:0.01357965,(C_cur:0.10648456,(T_bra:0.02337340,T_sca:0.04363735)0.9300:0.02363528)0.3100:0.01443890)0.1500:0.00910393,((T_cut:0.07255526,T_der:0.06757097)0.9100:0.03895028,(V_hum:0.06341258,(T_fae:0.00642191,(T_asa:0.02193638,T_ink:0.03291414)0.2400:0.01375443)1.0000:0.10668739)0.…		(((((((((T_asa:0.03101858,T_fae:0.04063361)0.9800:0.01895326,T_ink:0.04568659)1.0000:0.06063546V_hum:0.06780060)0.9800:0.02390213,(T_cut:0.06284240,T_der:0.06092385)1.0000:0.02690148)0.4300:0.01214448,C_cur:0.09028582)0.2700:0.01014272,((T_bra:0.02885023,T_sca:0.06196681)0.9000:0.02436756,(T_por:0.03887786,T_gam:0.05952597)0.8200:0.02418239)0.1600:0.01401131)0.1400:0.00612622,(T_gra:0.03226770,T_…
ATP-binding cassette (ABC) transporter	CND00300	(((((((T_asa:0.00266739,T_fae:0.00353816)0.9700:0.01845152,T_ink:0.02183838)1.0000:0.06891924,((T_por:0.05664281,T_gam:0.05061860)0.9900:0.03123305,((T_bra:0.01385869,T_sca:0.02567470)0.9000:0.01303481,(T_gra:0.02348977,T_lai:0.02825967)0.4900:0.01068053)1.0000:0.02756442)0.9700:0.02976502)0.1900:0.01371408,(C_cur:0.08184555,(T_cut:0.03624235,T_der:0.03087703)1.0000:0.03323833)0.4000:0.01656287)0…		(((((T_asa:0.03416985,T_fae:0.02642022)1.0000:0.02483356,T_ink:0.04883106)1.0000:0.06208144,(((C_cur:0.08922535,(T_cut:0.05646767,T_der:0.04693583)1.0000:0.03561070)0.8100:0.01557731,((T_por:0.06062371,T_gam:0.07899444)1.0000:0.03238871,((T_bra:0.04556701,T_sca:0.05979172)0.9100:0.02321974,(T_gra:0.03945011,T_lai:0.03916250)0.3800:0.00687968)1.0000:0.02291458)1.0000:0.02543620)0.5800:0.01807993,V…
DNA-dependent RNA polymerase II RPB140 (RPB2)	CND03540	(((((T_asa:0.00545666,T_fae:0.00583930)0.9900:0.01330391,T_ink:0.02273635)1.0000:0.04301711,(((((T_cut:0.03696110,T_der:0.01962231)0.9900:0.01692327,(T_por:0.02030249,T_gam:0.00744569)1.0000:0.03911795)0.5000:0.00844082,(((T_gra:0.02545979,T_lai:0.02908057)0.6300:0.00824917,T_bra:0.03234287)0.7500:0.01101916,T_sca:0.06858137)1.0000:0.02739331)0.4100:0.00613717,C_cur:0.10295993)0.2200:0.00730052,V…		(((((((T_asa:0.03290344,T_fae:0.03203241)1.0000:0.03244444,T_ink:0.07254463)1.0000:0.05991075,V_hum:0.09727926)0.8700:0.01927790,(((T_cut:0.06628919,T_der:0.06466384)1.0000:0.03345935,(T_por:0.06054954,T_gam:0.05597594)1.0000:0.03352380)0.9300:0.01763127,((T_bra:0.08797803,T_sca:0.11629650)0.9900:0.04275623,(T_gra:0.06097406,T_lai:0.05798398)1.0000:0.01459499)0.6200:0.03349249)0.4600:0.01753250)0…
adenylyl-sulfate kinase	CNE03380	((((T_ink:0.04598620,(T_asa:0.00672873,T_fae:0.01731216)0.9800:0.03738061)0.8000:0.03204851,(((((((T_gra:0.05367495,T_lai:0.03641376)0.7400:0.01931608,T_bra:0.04440621)0.2900:0.00877336,T_sca:0.04838165)0.4900:0.02511276,(T_cut:0.02230020,T_der:0.04958995)0.7700:0.02315476)0.3600:0.01786213,V_hum:0.05225403)0.6800:0.03929884,(T_por:0.08806825,T_gam:0.02748205)0.6200:0.03306366)0.4100:0.01165389,C…		(((T_ink:0.07360353,((T_asa:0.04678805,T_fae:0.05425363)1.0000:0.04673249,(C_cur:0.12353528,((((T_cut:0.05764421,T_der:0.05892950)0.9600:0.03679487,V_hum:0.08250170)0.4500:0.01686019,(((T_bra:0.06599150,T_sca:0.14685602)0.9200:0.05496784,T_gra:0.06046827)0.3900:0.01784303,T_lai:0.06831327)0.4100:0.01937089)0.2900:0.01558051,(T_por:0.08555503,T_gam:0.07179546)0.5700:0.02451776)0.5300:0.02137775)0.…
DNA-directed RNA polymerase ii largest subunit, putative (RPB1)	CNE03720	((((((T_asa:0.00564843,T_fae:0.01882402)1.0000:0.01198001,T_ink:0.03096753)1.0000:0.09701527,((C_cur:0.11751590,(T_cut:0.07858108,T_der:0.03230463)1.0000:0.06859164)1.0000:0.03670297,((T_por:0.03851736,T_gam:0.05106835)1.0000:0.03311542,(((T_bra:0.06276542,T_sca:0.09600636)0.8000:0.01667526,T_lai:0.03939954)0.6700:0.01386591,T_gra:0.07225909)1.0000:0.03489847)0.8500:0.02061413)0.7400:0.00905309)0…		(((((((T_asa:0.05029894,T_fae:0.05239092)1.0000:0.03263352,T_ink:0.08248190)1.0000:0.10006578,((T_cut:0.10097613,T_der:0.07237644)1.0000:0.08828912,((T_por:0.07497186,T_gam:0.08253299)1.0000:0.03725811,(((T_bra:0.11004966,T_sca:0.14089191)0.9800:0.04234085,T_lai:0.06208606)0.6800:0.03240364,T_gra:0.09925613)0.9900:0.03559468)1.0000:0.02842761)0.4700:0.01913216)0.4000:0.03051487V_hum:0.11833928)0.…
pyruvate carboxylase	CNF00650	((((((((T_asa:0.00715197,T_fae:0.00854510)0.9900:0.01386777,T_ink:0.02113607)1.0000:0.06275705,(T_cut:0.04023232,T_der:0.04309000)1.0000:0.02805526)0.8000:0.01658352,C_cur:0.05223532)0.4200:0.00945385,((T_bra:0.03382331,T_sca:0.06301341)0.8700:0.01887534,(T_gra:0.04440748,T_lai:0.03041252)1.0000:0.03248440)1.0000:0.02081727)0.3400:0.00785040,((T_por:0.04572560,T_gam:0.04160049)0.6000:0.00830735,V…		(((((((T_asa:0.02574857,T_fae:0.02258452)1.0000:0.02218468,T_ink:0.04609315)1.0000:0.05969887,(T_cut:0.05888593,T_der:0.06038093)1.0000:0.02931197)0.8600:0.01158762,C_cur:0.09411889)0.3700:0.00893677,(((T_por:0.07518092,T_gam:0.06809810)0.9200:0.01943322,V_hum:0.11111368)0.4500:0.01138860,((T_bra:0.05794700,T_sca:0.09589759)0.6500:0.01692624,(T_gra:0.06896439,T_lai:0.04513964)1.0000:0.02697796)1.…
phosphatidylinositol 3-kinase TOR1	CNF03740	(((((((T_asa:0.00190717,T_fae:0.00399161)1.0000:0.00964057,T_ink:0.00480962)1.0000:0.05235781,(C_cur:0.06810448,(T_cut:0.04757619,T_der:0.01734281)1.0000:0.02793758)1.0000:0.02517875)0.9800:0.01577019,((T_por:0.02468730,T_gam:0.02029386)1.0000:0.02406122,((T_bra:0.01349091,T_sca:0.04337760)0.9300:0.00748794,(T_gra:0.01015441,T_lai:0.01725688)1.0000:0.00903302)1.0000:0.02703802)1.0000:0.03510454)1…		(((((((T_asa:0.05362494,T_fae:0.04430954)1.0000:0.03360664,T_ink:0.08063214)1.0000:0.06572650,(C_cur:0.14387655,(T_cut:0.08944353,T_der:0.08948690)1.0000:0.04019400)0.5700:0.02442742)0.9600:0.02185407,((T_por:0.09117002,T_gam:0.09510917)1.0000:0.03400971,((T_bra:0.08027376,T_sca:0.11767510)1.0000:0.03667774,(T_gra:0.07207365,T_lai:0.08109729)1.0000:0.02050840)1.0000:0.03058383)1.0000:0.03327104)1…
DNA replication licensing factor cdc19 (cell division control protein 19)	CNG02380	((((((T_ink:0.02612605,(T_asa:0.00972674,T_fae:0.03213414)0.9700:0.02437123)1.0000:0.08768087,((T_por:0.07746487,T_gam:0.10606022)0.9600:0.03176841,(((T_gra:0.03542019,T_lai:0.02576651)1.0000:0.04285683,T_sca:0.02593076)0.9400:0.02512761,T_bra:0.18239186)0.7100:0.04316488)0.4300:0.01926719)0.2900:0.01349107V_hum:0.12641037)0.2900:0.01646381,(C_cur:0.15700816,(T_cut:0.19336776,T_der:0.08864610)1.0…		((((T_ink:0.11988800,(T_asa:0.04438800,T_fae:0.05165264)1.0000:0.03809780)1.0000:0.08321883,((V_hum:0.11969616,(C_cur:0.16679885,(T_cut:0.17404655,T_der:0.11336548)1.0000:0.06160742)0.7300:0.03170204)0.4300:0.01753696,(((T_por:0.10378151,T_gam:0.10542821)1.0000:0.03735017,((T_gra:0.06814745,T_lai:0.05940454)1.0000:0.03152772,T_sca:0.12083019)1.0000:0.03416800)0.7700:0.01672911,T_bra:0.19939504)0.…
orotidine monophosphate pyrophosphorylase (URA5)	CNG03730	(((((((T_asa:0.04752950,T_fae:0.01675466)1.0000:0.04479617,T_ink:0.07717418)0.9900:0.15498280,((T_por:0.03036331,T_gam:0.04338586)0.8600:0.04807175,(((T_gra:0.05350088,T_sca:0.12818278)0.2200:0.02289418,T_lai:0.02906656)0.3900:0.02896972,T_bra:0.07308603)0.6900:0.04294746)0.3300:0.02467326)0.2700:0.02964567,V_hum:0.09635929)0.4100:0.04788775,(C_cur:0.11881405,(T_cut:0.06624946,T_der:0.04525591)0.…		(((((T_asa:0.06780714,T_fae:0.04545019)1.0000:0.06907820,T_ink:0.07828385)1.0000:0.07710568,(((C_cur:0.12119269,(T_cut:0.06975050,T_der:0.05981209)1.0000:0.04955112)0.9800:0.04858069,((T_por:0.06378166,T_gam:0.09842144)0.9100:0.03273511,(T_sca:0.14183205,(T_gra:0.09709711,(T_bra:0.11717190,T_lai:0.05155394)0.3600:0.01586169)0.5800:0.02526260)0.5300:0.02676120)0.6300:0.03547735)0.3400:0.03108509,V…
malate synthase	CNH02910	((((((((T_asa:0.00555522,T_fae:0.00947338)1.0000:0.03790571,T_ink:0.07820828)1.0000:0.09114584,(T_cut:0.08302495,T_der:0.04519433)1.0000:0.07789883)0.4700:0.02704701,C_cur:0.08840222)0.4100:0.02339327,((T_por:0.05231007,T_gam:0.10163952)0.9700:0.05095015,((T_bra:0.03281078,T_sca:0.07009176)0.9600:0.02584111,(T_gra:0.01670430,T_lai:0.05192449)0.6300:0.01452046)0.9100:0.01944238)0.9700:0.04734613)0…		((((((((T_asa:0.02016467,T_fae:0.01584212)1.0000:0.03138864,T_ink:0.08989601)1.0000:0.05427236,(T_cut:0.06947367,T_der:0.07765069)1.0000:0.04784313)0.6800:0.02135289,C_cur:0.07580737)0.5300:0.01252728,((T_por:0.08018149,T_gam:0.08089856)1.0000:0.04282624,((T_bra:0.06192907,T_sca:0.08841752)1.0000:0.03729351,(T_gra:0.04947365,T_lai:0.03774769)0.7200:0.01037797)1.0000:0.01502090)1.0000:0.03086279)0…
isocitrate lyase	CNH03280	(((((((T_ink:0.04595153,(T_asa:0.00831989,T_fae:0.02967290)0.9900:0.03663158)1.0000:0.09529272,(((T_gra:0.04338676,T_lai:0.03894008)0.8200:0.02003433,T_bra:0.06106577)0.4500:0.01984420,T_sca:0.08805095)0.9300:0.02737827)0.5400:0.01495494V_hum:0.09108543)0.4500:0.02868872,(T_por:0.07451566,T_gam:0.10119314)0.9400:0.02854985)0.3200:0.01618317,(C_cur:0.10937534,(T_cut:0.05936168,T_der:0.05345677)1.0…		(((((((T_ink:0.07450915,(T_asa:0.02996053,T_fae:0.04512191)1.0000:0.03286565)1.0000:0.07353116,((T_bra:0.05844506,T_sca:0.07419476)0.8000:0.02424470,(T_gra:0.08275788,T_lai:0.04455023)0.7100:0.01926709)0.9800:0.02536362)0.7500:0.02081403,(T_por:0.10501401,T_gam:0.10204316)0.8700:0.03000113)0.5600:0.01659557,(T_cut:0.06108795,T_der:0.07569449)1.0000:0.05340124)0.5100:0.01434630,(C_cur:0.10976356V_…
DNA-directed RNA polymerase	CNI00420	(((((T_ink:0.00375893,(T_asa:0.00349451,T_fae:0.00355475)0.8600:0.00429155)1.0000:0.03864606V_hum:0.07781921)0.6900:0.01228768,((C_cur:0.03844411,(T_cut:0.03412812,T_der:0.00888523)1.0000:0.04964669)0.6500:0.00885352,((T_por:0.01349159,T_gam:0.02202739)0.9600:0.01256261,(((T_bra:0.01382184,T_sca:0.01996943)0.7800:0.01015425,T_lai:0.01627160)0.3700:0.00323523,T_gra:0.00977612)1.0000:0.02623527)0.9…		((((((T_asa:0.05773224,T_fae:0.05997059)0.8700:0.01933269,T_ink:0.06831446)1.0000:0.06572350,((C_cur:0.10467086,(T_cut:0.08269767,T_der:0.06184678)1.0000:0.04811504)0.4800:0.01353150,((T_por:0.07194651,T_gam:0.08199034)0.9300:0.02403598,((T_bra:0.07013707,T_sca:0.11787670)0.6300:0.03130118,(T_gra:0.05772566,T_lai:0.05744589)0.9900:0.01618339)0.7600:0.02498725)0.7600:0.02119201)0.2500:0.01764454)0…
vacuolar ATP synthase	CNI01180	((((((((T_bra:0.02957499,T_sca:0.00920030)0.9400:0.02307609,(T_gra:0.02611030,T_lai:0.01194179)0.5300:0.00631663)0.7900:0.01512655,(T_por:0.01866015,T_gam:0.02920234)0.9500:0.02636816)0.7000:0.01143131,(T_ink:0.03274168,(T_asa:0.01606437,T_fae:0.00724740)0.9600:0.02386224)0.9900:0.03472679)0.3000:0.00503609,V_hum:0.02255358)0.7200:0.01590899,(T_cut:0.01334283,(T_der:0.01980680,C_cur:0.04160686)0.…		(((((((((T_asa:0.03534558,T_fae:0.03118714)1.0000:0.03109999,T_ink:0.06372010)1.0000:0.05968326,(T_cut:0.04655999,T_der:0.05719994)0.8900:0.01986281)0.2200:0.01788246,(T_por:0.04903544,T_gam:0.06210507)0.5200:0.02367406)0.0900:0.01835983,V_hum:0.06339323)0.1000:0.01646592,((T_bra:0.05816967,T_sca:0.06914702)0.7500:0.02421499,(T_gra:0.04215204,T_lai:0.04408942)0.3700:0.00821426)0.9900:0.02466967)0…
phosphoenolpyruvate carboxykinase	CNI03590	(((((T_ink:0.01942901,(T_asa:0.00000000,T_fae:0.00542786)0.9700:0.01500297)1.0000:0.03877211,((C_cur:0.04753581,(T_cut:0.02582864,T_der:0.01648317)0.9200:0.01743895)0.8500:0.01989109,((T_por:0.02019215,T_gam:0.02021511)0.4400:0.00331725,((T_lai:0.00559440,T_sca:0.02908529)0.5300:0.00580688,(T_bra:0.01965608,T_gra:0.01057024)0.7100:0.00452820)0.8900:0.01328514)0.9700:0.03105425)0.4400:0.01951280)0…		(((((((T_asa:0.01218796,T_fae:0.00692393)1.0000:0.02158781,T_ink:0.03284818)1.0000:0.03183560,(C_cur:0.06045059,(T_cut:0.03487166,T_der:0.03935384)0.8100:0.01531545)1.0000:0.02375198)0.8100:0.01763114,V_hum:0.04516753)0.3400:0.00970406,((T_por:0.03329731,T_gam:0.03493879)0.7500:0.00829642,(((T_bra:0.03375048,T_sca:0.03172027)0.9200:0.01417368,T_gra:0.02707385)0.4000:0.00711169,T_lai:0.01653628)0.…
RAS2	CNJ01920	(((((T_asa:0.00266464,T_fae:0.00000000)0.9700:0.00476898,T_ink:0.00610135)1.0000:0.04203562,((((C_cur:0.06157886,(T_cut:0.04375764,T_der:0.00000000)0.9400:0.02505410)0.5500:0.01658810,T_bra:0.02071898)0.2000:0.01018712,(T_sca:0.03121914,(T_gra:0.01585279,T_lai:0.01329710)0.9000:0.01197448)0.4500:0.00848220)0.0200:0.00616765,((T_por:0.01066048,T_gam:0.00792759)0.9500:0.01240400,V_hum:0.03732397)0.…		((((T_ink:0.01626886,(T_asa:0.00840144,T_fae:0.00172993)0.9900:0.01717929)1.0000:0.03540461,((C_cur:0.05843581,((((T_cut:0.05519933,T_der:0.01453977)0.9900:0.02736651,T_bra:0.03441175)0.3600:0.01201098,((T_por:0.01384600,T_gam:0.01738654)0.9700:0.01583358,T_sca:0.06069464)0.5300:0.00971199)0.2000:0.01077258,(T_gra:0.02309602,T_lai:0.03630866)0.8800:0.01721686)0.5100:0.00989786)0.3100:0.01334662,V…
glutamate synthase (NADH)	CNJ02910	(((((((T_asa:0.04884360,T_fae:0.01632742)1.0000:0.03478742,T_ink:0.04991803)1.0000:0.10600544,(C_cur:0.09351248,(T_cut:0.04055447,T_der:0.03176608)1.0000:0.03839958)1.0000:0.05716084)0.4200:0.02269235,((T_por:0.04795083,T_gam:0.04752172)1.0000:0.04023068,((T_bra:0.05514905,T_sca:0.04932730)0.8000:0.01309240,(T_gra:0.04857548,T_lai:0.03855061)0.9100:0.02118699)1.0000:0.04883728)1.0000:0.02534305)0…		(((((((T_asa:0.07610916,T_fae:0.04939547)1.0000:0.04275018,T_ink:0.08468532)1.0000:0.07794944,((T_cut:0.06615756,C_cur:0.11200906)0.5000:0.03096708,T_der:0.07715776)1.0000:0.04618704)1.0000:0.02851725,((T_por:0.06270220,T_gam:0.06485270)1.0000:0.03387980,((T_bra:0.08165133,T_sca:0.10460791)0.7500:0.02191324,(T_gra:0.08453445,T_lai:0.06159673)1.0000:0.02615890)1.0000:0.03926081)0.9300:0.01873657)0…
methylenetetrahydrofolate reductase (NADPH)	CNL04820	(((((((T_asa:0.00672265,T_fae:0.01452064)1.0000:0.03552801,T_ink:0.04081152)1.0000:0.05213858,(C_cur:0.09150609,(T_cut:0.05812953,T_der:0.01323337)1.0000:0.05841487)0.8000:0.02974837)0.5900:0.02394336,((T_por:0.01820045,T_gam:0.04145143)1.0000:0.03523753,((T_bra:0.03433546,T_sca:0.03514811)0.7500:0.00972424,(T_gra:0.02091432,T_lai:0.01962116)1.0000:0.01778624)0.9800:0.02426268)0.9000:0.02456134)0…		(((((((T_asa:0.03318481,T_fae:0.04020946)1.0000:0.03838742,T_ink:0.07511733)1.0000:0.05890865,(C_cur:0.13025639,(T_cut:0.06369022,T_der:0.06593861)1.0000:0.05520541)0.5300:0.02322855)0.8500:0.02616436,(((T_por:0.05592310,T_gam:0.05853311)1.0000:0.03489169,(T_sca:0.08645701,(T_bra:0.08635149,(T_gra:0.06446868,T_lai:0.03939658)0.9900:0.02069267)0.6400:0.01209882)0.9900:0.02828216)0.9900:0.02135938,…
eukaryotic translation initiation factor 3 subunit 6	CNL05160	((((((((T_por:0.02345372,T_gam:0.01810193)1.0000:0.03965485V_hum:0.07816891)0.5300:0.01467997,(T_cut:0.04644929,T_der:0.04371533)0.9500:0.03298210)0.2300:0.01223688,C_cur:0.07673981)0.6700:0.01881128,(B_kor:0.04776775,C_tep:0.05571307)1.0000:0.09582229)0.3800:0.01611447,((T_bra:0.04384786,T_sca:0.06179265)0.6100:0.01763121,(T_gra:0.02591599,T_lai:0.04526315)0.7600:0.01721123)1.0000:0.10995836)0.2…		((((T_ink:0.08556344,(T_asa:0.01919383,T_fae:0.01693278)1.0000:0.02793079)1.0000:0.06023382,(((((T_gra:0.04904965,T_lai:0.04646892)1.0000:0.02444101,T_bra:0.07651085)0.4800:0.01462024,T_sca:0.10415057)1.0000:0.06064784,(T_cut:0.07423271,T_der:0.05840403)1.0000:0.03307238)0.7000:0.01598975,(V_hum:0.09145009,(C_cur:0.10224479,(T_por:0.05324090,T_gam:0.05616512)1.0000:0.03890183)0.4100:0.01552881)0.…
translation elongation factor 1-alpha	CNM01300	((((B_kor:0.02259871,C_tep:0.00694441)0.9700:0.02502663,(((((T_asa:0.00646101,T_fae:0.00000000)0.5600:0.00211172,T_ink:0.01085739)1.0000:0.02388435,(T_gra:0.02290494,T_lai:0.01105915)0.4400:0.01188081)0.2600:0.01241597,T_der:0.01034916)0.0500:0.00577009,(V_hum:0.02009204,(C_cur:0.02825756,(T_cut:0.02341476,(T_bra:0.01109110,T_sca:0.03405191)0.9900:0.02820098)0.1700:0.00546881)0.0400:0.00000000)0.…		((((((T_por:0.02781094,T_gam:0.03725648)1.0000:0.02154956,(T_asa:0.01164411,(T_fae:0.01685444,T_ink:0.06370093)0.5800:0.01029832)1.0000:0.03575444)0.4400:0.01032328,(((((T_cut:0.03753462,T_der:0.01920144)0.6000:0.00786393V_hum:0.04341356)0.8000:0.01240597,C_cur:0.03413333)0.3400:0.01088417,(T_bra:0.02967821,T_sca:0.05397330)0.9800:0.01828421)0.3900:0.00833517,(T_gra:0.03522505,T_lai:0.02557257)0.…
chaperone	CNM01520	((((((((T_asa:0.00000000,T_fae:0.00140737)1.0000:0.01501320,T_ink:0.01717599)1.0000:0.06421206,(C_cur:0.06740901V_hum:0.04906738)0.4300:0.01972146)0.2200:0.00860515,(T_cut:0.01955542,T_der:0.03169594)0.9900:0.02713003)0.4600:0.01365957,((T_bra:0.06020090,T_sca:0.03927120)0.5900:0.01665806,(T_gra:0.03362409,T_lai:0.02110002)0.8600:0.01217132)0.7000:0.02036598)0.1700:0.00916418,(T_por:0.03736331,T_…		((((((((((T_asa:0.01737061,T_fae:0.01741940)1.0000:0.01820064,T_ink:0.05501074)1.0000:0.04536404,C_cur:0.06356333)0.6900:0.01853478,(T_cut:0.04176954,T_der:0.02897411)1.0000:0.02341459)0.3900:0.01122391V_hum:0.05452275)0.5000:0.01062997,(T_por:0.04073009,T_gam:0.04829202)0.9600:0.01574415)0.7000:0.01063995,(T_sca:0.04921214,(T_gra:0.03997046,T_lai:0.03617337)0.9300:0.01634249)0.8400:0.01276665)0.…
plasma membrane H(+)-ATPase 1	CNN01260	((((((T_ink:0.02599394,(T_asa:0.00387560,T_fae:0.00724326)1.0000:0.01576168)1.0000:0.04452880,C_cur:0.08226173)0.7400:0.01429145,(T_cut:0.06363533,T_der:0.03522805)1.0000:0.03681155)0.4700:0.01641062,(((T_por:0.03276021,T_gam:0.03412763)1.0000:0.02646609,((T_bra:0.03977980,T_sca:0.04418280)0.7700:0.01783746,(T_gra:0.02595596,T_lai:0.04222584)0.5400:0.00996792)1.0000:0.03225976)0.6200:0.01647186,V…		((((((T_ink:0.04629681,(T_asa:0.00981662,T_fae:0.01898982)1.0000:0.02712877)1.0000:0.04317944,C_cur:0.08878113)0.5300:0.01845394,((V_hum:0.05691304,(T_cut:0.07898259,T_der:0.04545790)0.9900:0.03129527)0.7500:0.01502506,((T_por:0.04137173,T_gam:0.03934774)1.0000:0.02338969,((T_bra:0.05908454,T_sca:0.05303565)0.9300:0.02076759,(T_gra:0.04729129,T_lai:0.04783712)0.6200:0.00764469)1.0000:0.03236053)0…
1,3-beta-glucan synthase	CNN02320	((((((T_ink:0.04629681,(T_asa:0.00981662,T_fae:0.01898982)1.0000:0.02712877)1.0000:0.04317944,C_cur:0.08878113)0.5300:0.01845394,((V_hum:0.05691304,(T_cut:0.07898259,T_der:0.04545790)0.9900:0.03129527)0.7500:0.01502506,((T_por:0.04137173,T_gam:0.03934774)1.0000:0.02338969,((T_bra:0.05908454,T_sca:0.05303565)0.9300:0.02076759,(T_gra:0.04729129,T_lai:0.04783712)0.6200:0.00764469)1.0000:0.03236053)0…		((((((T_ink:0.05517628,(T_asa:0.03908739,T_fae:0.03337822)1.0000:0.03111646)1.0000:0.07447535,(T_cut:0.06610909,T_der:0.06061104)1.0000:0.05251904)0.3700:0.01567107,(((T_por:0.06308255,T_gam:0.07045212)1.0000:0.04354366,((T_bra:0.06968787,T_sca:0.07961625)1.0000:0.03224791,(T_gra:0.06538550,T_lai:0.05508866)1.0000:0.02312010)1.0000:0.03708714)0.4600:0.01848084,(C_cur:0.13775318,V_hum:0.09358667)0…
*1, The tree was constructed using the Maximum Likelihood method based on the JTT matrix-based model for amino acid sequences [45] and Tamura-Nei model for nucleotide sequences [44]. The bootstrap consensus tree inferred from 100 replicates [46]. Total positions in the final dataset are shown in Table 2. Evolutionary analyses were conducted in MEGA6 [43].
